# Supplementary material
Source: Springer Nature journal article supplement (https://www.springermedizin.de/resource/supplementary/12888_2007_461_MOESM4_ESM.pdf/9483320)

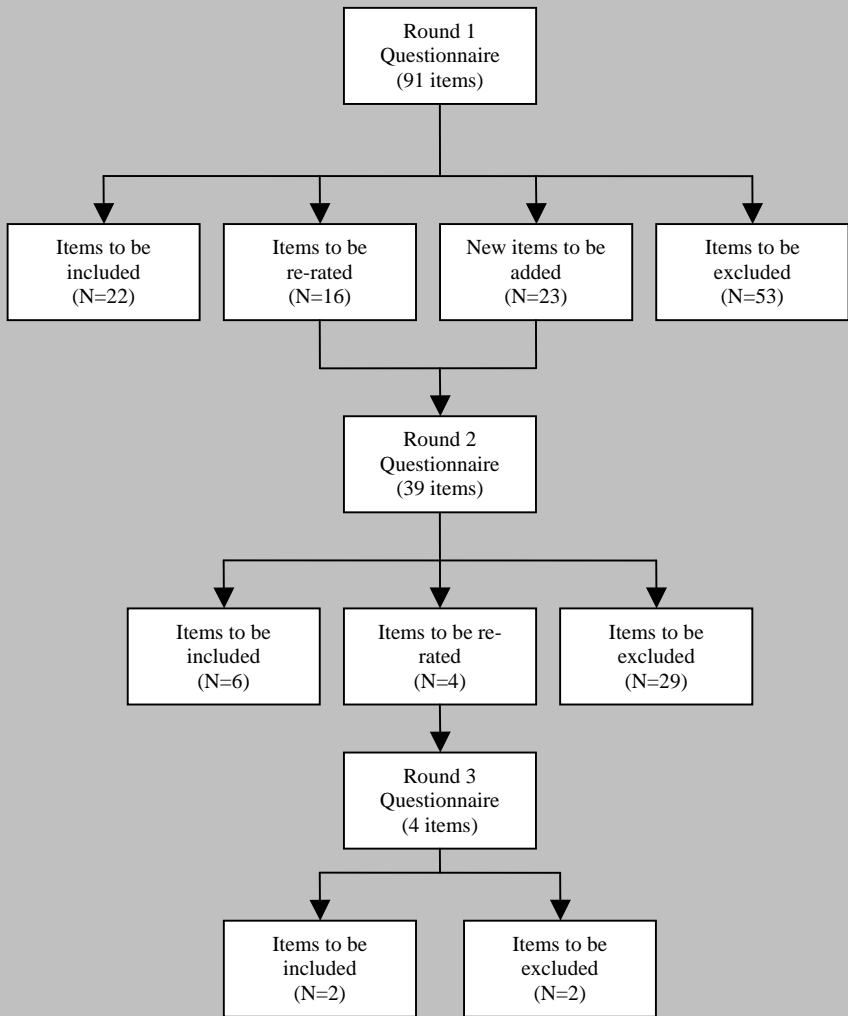

Supplement: MOESM4 [file 9483320]
